# Supplementary material for: Fistula recurrence, pregnancy, and childbirth following successful closure of female genital fistula in Guinea: a longitudinal study
Source: PubMed Central journal article supplement (PMC6530985; doi:10.1016/s2214-109x(17)30366-2), 2017-09-21
Supplement: NIHMS1018216-supplement-Supplementary_Appendix.pdf [file NIHMS1018216-supplement-Supplementary_Appendix.pdf]

# THE LANCET

## Global Health

### Supplementary appendix

This appendix formed part of the original submission and has been peer reviewed.  
We post it as supplied by the authors.

Supplement to: Delamou A, Delvaux T, El Ayadi AM, et al. Fistula recurrence, pregnancy, and childbirth following successful closure of female genital fistula in Guinea: a longitudinal study. *Lancet Glob Health* 2017; published online Sept 20. [http://dx.doi.org/10.1016/S2214-109X\(17\)30366-2](http://dx.doi.org/10.1016/S2214-109X(17)30366-2).

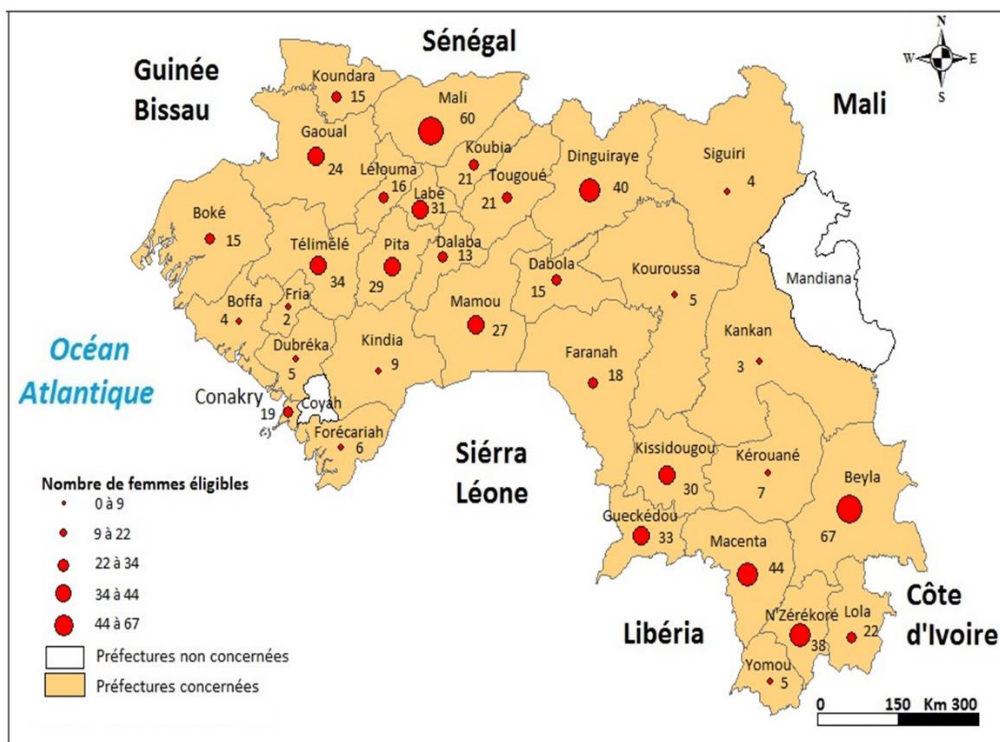

Figure (a)

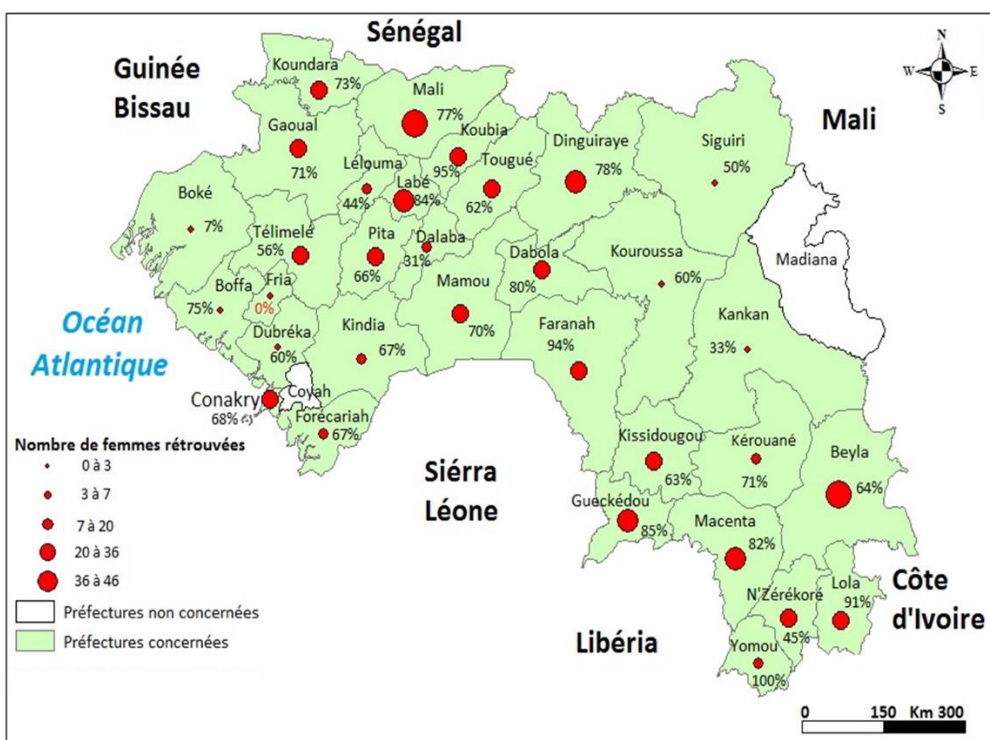

Figure (b)

**Additional file 1.** Distribution across the country of eligible women (figure a; n=682) and those women included in the study (figure b; n=481), 2012 to 2016, Guinea.
